# Supplementary material for: Molecular Breeding for Improving Productivity of Oryza sativa L. cv. Pusa 44 under Reproductive Stage Drought Stress through Introgression of a Major QTL, qDTY12.1
Source: MDPI journal article supplement (doi:10.3390/genes12070967), 2021-06-24
Supplement: s1 [file s1]

**Supplementary Table S1.** Agronomic characters of Pusa 44 *qDTY12.1* near isogenic lines during 2019 dry season in Aduthurai.

| No. | Pedigree                 | DFF (days) | PH (cm)              | TLN   | PL (cm)             | FGNP                 | TGP                  | SFP (%)            | 1000GW (g)           | PLY (g.sqm <sup>-1</sup> ) |
|-----|--------------------------|------------|----------------------|-------|---------------------|----------------------|----------------------|--------------------|----------------------|----------------------------|
| 1   | Pusa 3003-15-121-17-47-2 | 108.50     | 90.50 <sup>ab</sup>  | 9.9   | 23.05 <sup>b</sup>  | 128.10 <sup>ab</sup> | 167.00 <sup>ab</sup> | 76.64 <sup>a</sup> | 20.52 <sup>ab</sup>  | 400.50 <sup>ab</sup>       |
| 2   | Pusa 3003-15-121-17-47-5 | 114.50     | 91.60 <sup>ab</sup>  | 13.6  | 23.50 <sup>ab</sup> | 124.10 <sup>ab</sup> | 180.40 <sup>ab</sup> | 69.64 <sup>a</sup> | 20.39 <sup>abc</sup> | 412.84 <sup>ab</sup>       |
| 3   | Pusa 3003-15-121-29-2-1  | 108.50     | 80.20 <sup>cd</sup>  | 15.3  | 24.92 <sup>ab</sup> | 94.30 <sup>b</sup>   | 164.20 <sup>b</sup>  | 57.42 <sup>a</sup> | 19.31 <sup>b-e</sup> | 294.33 <sup>b</sup>        |
| 4   | Pusa 3003-15-121-29-21-4 | 110.00     | 87.20 <sup>a-d</sup> | 11.8  | 25.23 <sup>ab</sup> | 123.10 <sup>ab</sup> | 203.70 <sup>ab</sup> | 61.30 <sup>a</sup> | 18.80 <sup>de</sup>  | 473.34 <sup>ab</sup>       |
| 5   | Pusa 3003-15-121-29-23-2 | 109.50     | 88.00 <sup>a-d</sup> | 12.0  | 24.87 <sup>ab</sup> | 127.20 <sup>ab</sup> | 187.80 <sup>ab</sup> | 67.47 <sup>a</sup> | 18.76 <sup>de</sup>  | 392.16 <sup>ab</sup>       |
| 6   | Pusa 3003-15-121-29-25-2 | 109.50     | 88.00 <sup>a-d</sup> | 10.5  | 24.98 <sup>ab</sup> | 133.80 <sup>ab</sup> | 197.90 <sup>ab</sup> | 67.64 <sup>a</sup> | 20.23 <sup>abc</sup> | 392.16 <sup>ab</sup>       |
| 7   | Pusa 3003-15-121-29-3-1  | 108.00     | 90.90 <sup>ab</sup>  | 16.9  | 25.43 <sup>ab</sup> | 144.60 <sup>ab</sup> | 195.40 <sup>ab</sup> | 72.80 <sup>a</sup> | 19.24 <sup>b-e</sup> | 411.66 <sup>ab</sup>       |
| 8   | Pusa 3003-15-121-29-32-3 | 107.00     | 92.90 <sup>a</sup>   | 11.3  | 24.30 <sup>ab</sup> | 133.90 <sup>ab</sup> | 188.10 <sup>ab</sup> | 71.05 <sup>a</sup> | 20.25 <sup>abc</sup> | 369.34 <sup>ab</sup>       |
| 9   | Pusa 3003-15-121-31-32   | 108.00     | 87.50 <sup>a-d</sup> | 11.3  | 24.04 <sup>ab</sup> | 131.30 <sup>ab</sup> | 173.70 <sup>ab</sup> | 75.38 <sup>a</sup> | 21.09 <sup>a</sup>   | 377.66 <sup>ab</sup>       |
| 10  | Pusa 3003-15-121-9-37-2  | 109.00     | 93.80 <sup>a</sup>   | 13.8  | 24.32 <sup>ab</sup> | 129.10 <sup>ab</sup> | 201.20 <sup>ab</sup> | 65.84 <sup>a</sup> | 19.44 <sup>b-e</sup> | 352.66 <sup>ab</sup>       |
| 11  | Pusa 3003-15-121-9-43-2  | 108.50     | 90.90 <sup>ab</sup>  | 12.9  | 24.53 <sup>ab</sup> | 136.50 <sup>ab</sup> | 223.80 <sup>a</sup>  | 60.49 <sup>a</sup> | 19.24 <sup>b-e</sup> | 361.00 <sup>ab</sup>       |
| 12  | Pusa 3003-15-121-9-5-3   | 107.00     | 88.50 <sup>abc</sup> | 11.4  | 24.20 <sup>ab</sup> | 137.30 <sup>ab</sup> | 204.20 <sup>ab</sup> | 67.50 <sup>a</sup> | 19.16 <sup>b-e</sup> | 327.52 <sup>b</sup>        |
| 13  | Pusa 3003-15-121-9-5-5   | 108.00     | 89.00 <sup>abc</sup> | 16.7  | 25.82 <sup>a</sup>  | 163.50 <sup>a</sup>  | 225.20 <sup>a</sup>  | 72.61 <sup>a</sup> | 18.71 <sup>de</sup>  | 279.50 <sup>b</sup>        |
| 14  | Pusa 3003-15-121-9-6-3   | 107.00     | 91.00 <sup>ab</sup>  | 10.1  | 25.56 <sup>a</sup>  | 156.30 <sup>ab</sup> | 211.50 <sup>ab</sup> | 74.47 <sup>a</sup> | 19.73 <sup>a-e</sup> | 476.72 <sup>ab</sup>       |
| 15  | Pusa 3003-15-121-9-7-2   | 108.00     | 86.40 <sup>a-d</sup> | 13.0  | 24.69 <sup>ab</sup> | 96.30 <sup>b</sup>   | 178.40 <sup>ab</sup> | 54.05 <sup>a</sup> | 19.62 <sup>b-e</sup> | 327.67 <sup>b</sup>        |
| 16  | Pusa 3003-15-121-30-23   | 108.00     | 91.20 <sup>ab</sup>  | 12.3  | 24.69 <sup>ab</sup> | 125.40 <sup>ab</sup> | 181.80 <sup>ab</sup> | 69.28 <sup>a</sup> | 19.80 <sup>a-d</sup> | 540.00 <sup>a</sup>        |
| 17  | Pusa 3003-15-121-31-1    | 108.00     | 78.40 <sup>d</sup>   | 19.4  | 24.51 <sup>ab</sup> | 112.20 <sup>ab</sup> | 161.70 <sup>b</sup>  | 70.48 <sup>a</sup> | 19.02 <sup>cde</sup> | 322.67 <sup>b</sup>        |
| 18  | Pusa 3003-15-121-9-27    | 108.00     | 83.90 <sup>a-d</sup> | 13.1  | 24.94 <sup>ab</sup> | 135.90 <sup>ab</sup> | 195.70 <sup>ab</sup> | 70.62 <sup>a</sup> | 19.24 <sup>b-e</sup> | 400.50 <sup>ab</sup>       |
| 19  | Pusa 44                  | 108.00     | 82.50 <sup>bcd</sup> | 9.2   | 25.20 <sup>ab</sup> | 148.00 <sup>ab</sup> | 192.20 <sup>ab</sup> | 76.26 <sup>a</sup> | 18.34 <sup>e</sup>   | 402.67 <sup>ab</sup>       |
|     | CV%                      | 1.67       | 2.78                 | 20.87 | 2.45                | 12.16                | 7.54                 | 8.43               | 1.79                 | 13.54                      |
|     | CD                       | ns         | 9.92                 | ns    | 2.45                | 64.45                | 58.55                | 23.44              | 1.42                 | 211.66                     |

DFF, Days to 50% flowering; PH, Plant height; TLN, tillers number per hill; PL, panicle length; FGNP, filled grains number per panicle; TGP, number of total grains per panicle; SFP, spikelet fertility per cent; 1000GW, 1000 grain weight; PLY, plot yield, ns, non-significant; CV%, coefficient of variation; CD, critical differences,
